# Supplementary material for: Laser-Ablative Synthesis of Silicon–Iron Composite Nanoparticles for Theranostic Applications
Source: MDPI journal article supplement (doi:10.3390/nano13152256), 2023-08-05
Supplement: s1 [file s1]

## Supplementary Materials

# Laser-Ablative Synthesis of Silicon–Iron Composite Nanoparticles for Theranostic Applications

Alexander A. Bubnov <sup>1,2</sup>, Vladimir S. Belov <sup>1</sup>, Yulia V. Kargina <sup>1,3</sup>, Gleb V. Tikhonowski <sup>1</sup>, Anton A. Popov <sup>1</sup>,

Alexander Yu. Kharin <sup>1</sup>, Mikhail V. Shestakov <sup>1,4</sup>, Alexander M. Perepukhov <sup>5</sup>, Alexander V. Syuy <sup>5</sup>, Valentyn S. Volkov <sup>5</sup>, Vladimir V. Khovaylo <sup>6</sup>, Sergey M. Klimentov <sup>1</sup>, Andrei V. Kabashin <sup>7,\*</sup> and Victor Yu. Timoshenko <sup>1,3,\*</sup>

<sup>1</sup> Institute of Engineering Physics for Biomedicine (PhysBio), National Nuclear Research University MEPhI, 115409 Moscow, Russia; bubnovmeph@gmail.com (A.A.B.); vsbelov@mephi.ru (V.S.B.); juliakargina@gmail.com (Y.V.K.); gtikhonowski@gmail.com (G.V.T.); aapopov1@mephi.ru (A.A.P.); aykharin@mephi.ru (A.Y.K.); mvshestakov@rgau-msha.ru (M.V.S.); smklimentov@mephi.ru (S.M.K.)

<sup>2</sup> Endocrinology Research Centre, Dmitry Ulyanov Street 11, 292236 Moscow, Russia;

<sup>3</sup> Faculty of Physics, Lomonosov Moscow State University, Leninskie Gory 1, 119991 Moscow, Russia

<sup>4</sup> Moscow Timiryazev Agricultural Academy - Russian State Agrarian University, 127434 Moscow, Russia

<sup>5</sup> Moscow Institute of Physics and Technology, Dolgoprudny, 141700 Moscow Region, Russia; aleksandr-iv@mail.ru (A.M.P.); alsyuy271@gmail.com (A.V.S.); vsv.mipt@gmail.com (V.S.V.)

<sup>6</sup> Department of Functional Nanosystems and High-Temperature Materials, National University of Science and Technology MISIS, Leninskiy Prospekt 4, 119049 Moscow, Russia; khovaylo@misys.ru

<sup>7</sup> LP3, Aix Marseille University, CNRS, Campus de Luminy, Case 917, 13288 Marseille, France

\* Correspondence: andrei.kabashin@univ-amu.fr (A.V.K.); timoshen@physics.msu.ru (V.Y.T.)

## 1. NPs synthesis

Crystalline silicon (c-Si) wafers were used as a target for preparation of Si NPs. There are some characteristics of wafers: resistivity of 10–20 Ohm·cm and crystallographic surface orientation (1 0 0). The surface of the wafers were covered of natural silicon oxide form. In order to remove the layer of oxide we treated wafers with an aqueous solution of HF (48%) for 1–2 s. For laser ablation we used a linearly polarized beam of a femtosecond laser (Teta 10 system, Avesta Ltd., Russia) at 1030 nm with pulse duration 270 fs, energy 100  $\mu$ J per pulse, and repetition rate 10 kHz. A laser beam (3 mm in diameter) was focused onto target immersed in 10 mL of deionized water at normal incidence. The laser synthesis was done for 1 h at room temperature. Aqueous suspensions of laser-synthesized Si NPs with initial concentration of 0.1 mg/mL were centrifuged (12000 g, 20 min) to obtain the concentration of 4 mg/mL. In further experiments the suspension was diluted to get the concentration about 1 and 0.1 mg/mL to study the photoheating and optical extinction, respectively.

## 2. TEM analysis

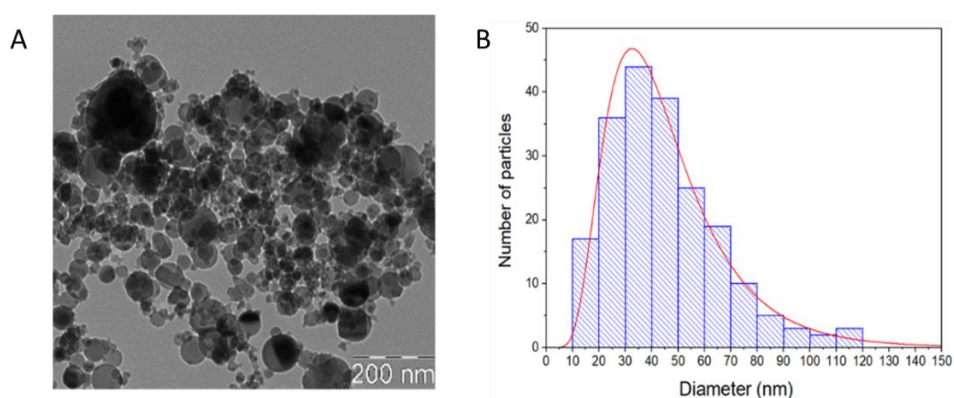

Figure S1. (A) Typical TEM image of Si NPs; (B) Size distribution of Si NPs obtained from the image in panel A where the red curve gives a fit by the lognormal function.
